# Supplementary material for: Metallic plasmons significantly boosted visible-light photocatalytic hydrogen evolution from water splitting
Source: Royal Society of Chemistry journal article supplement (doi:10.1039/d2se01523d), 2022-11-17
Supplement: d2se01523d1.pdf [file d2se01523d1.pdf]

## **Supplementary Information**

# **Metallic plasmons significantly boosted visible-light photocatalytic hydrogen evolution from water splitting**

**Ikram Ullah,<sup>a</sup> Cong Ling,<sup>a</sup> Jing-Han Li,<sup>a</sup> Xiao-Jie Lu,<sup>a</sup> Chenchuang Li,<sup>a</sup> Zhengkun Yang,<sup>b</sup>  
Xiao-Jun Qian,<sup>a</sup> Gang Wang,<sup>a\*</sup> and An-Wu Xu<sup>a\*</sup>**

<sup>a</sup>Division of Nanomaterials and Chemistry, Hefei National Research Center for Physical Sciences at the Microscale, The First Affiliated Hospital, University of Science and Technology of China, Hefei, Anhui 230026, P. R. China.

<sup>b</sup>Institutes of Physical Science and Information Technology, Key Laboratory of Structure and Functional Regulation of Hybrid Materials, Ministry of Education, Anhui Graphene Engineering Laboratory, Anhui University, Hefei, Anhui 230601, P. R. China.

\*Corresponding authors:

E-mail: [anwuxu@ustc.edu.cn](mailto:anwuxu@ustc.edu.cn) (A.W.X.)

E-mail: [wanggang829@126.com](mailto:wanggang829@126.com) (G. Wang.)

## 1. Characterization

X-ray diffraction (XRD) patterns were recorded on a Rigaku X-ray diffractometer (MXPAHF, Japan) with Cu  $k\alpha$  radiation ( $\lambda = 1.541 \text{ \AA}$ ), 20 mA current, and 40 kV operating voltage. XRD data were collected at a diffraction angle of  $10\text{--}80^\circ$  with a scanning rate of  $10^\circ \text{ min}^{-1}$ . Fourier-transformed infrared (FTIR) spectroscopy of samples with KBR pellets were characterized by a Nicolet Nexus spectrometer. UV-vis diffuse reflectance spectra (DRS) of the synthesized photocatalysts were collected in a Shimadzu UV-2501 PC spectrophotometer. Electron paramagnetic resonance (EPR) tests of the samples were carried out on a Bruker model A300 spectrometer. Transmission electron microscopy (TEM) and elemental mapping images of the photocatalysts were taken on HITACHI H-7650 TEM operated at 100 kV. Scanning electron microscopy (SEM) images were obtained on a JEOL SM-6601F. X-ray photoelectron spectroscopy (XPS) measurements were conducted on Perkin-Elmer RBD upgraded PHI-5000C ESCA technique. Photoluminescence (PL) measurements were recorded on JY Fluorolog-3-Tau apparatus. Time-resolved photoluminescence (TRPL) spectra were obtained on a Laser strobe time-resolved spectrometer with an  $\text{N}_2$  laser and a USHIO xenon light source. The specific surface areas were measured via Brunauer-Emmett-Teller (BET) method.

## 2. Photoelectrochemical tests

The photoelectrochemical measurement of the photocatalysts were conducted at the CHI 760E electrochemical workstation integrated with a reference (Ag/AgCl), counter (Pt), and the working electrode, respectively. The electrolyte solution was formed by adding 7.1 g of  $\text{Na}_2\text{SO}_4$  in deionized water (100 mL) and xenon lamp (300 W) was used as a light-source in the experiments. For the working electrode, the samples were prepared by sonicating 2 mg of samples in 1 mL

ethanol and 15  $\mu\text{L}$  Nafion solution (5%). After that, the well-mixed solution was dropped on glass with an exact area of  $1\text{ cm}^2$ , respectively. The transient photocurrent response was carried out with a 0.5 V bias voltage applied by an on/off switch. The EIS Nyquist patterns were measured under visible-light irradiation with -1 V bias and frequency ranging from 10 MHz to 100.

### 3. Photocatalytic hydrogen evolution measurements

The hydrogen evolution tests were conducted on an irradiated Pyrex reaction vessel (500 mL) in a connected photocatalytic water splitting system (Labsolar 6A, Beijing Perfect Light Co. Ltd, China). Xenon lamp (300 W) was employed as a light-source with 420 nm cutoff filter during experiments. In a conventional procedure, 100 mL solution comprising 0.05 g photocatalyst was dissolved in 100 mL solution containing 10 vol% TEAO with 1 wt% Pt ( $\text{H}_2\text{PtCl}_6 \cdot 6\text{H}_2\text{O}$  precursor). The resultant suspension was sonicated for 40 min before the photocatalytic reaction. Then, the well-mixed solution was expunged by  $\text{N}_2$  gas for 45 min to eliminate the inside air before being exposed to light. Afterward, irradiated by Xe lamp for 30 min without cutoff filter for photo-deposition of Pt over the surface of the catalyst. To maintain uniform irradiation, the suspension was agitated during the photocatalytic experiment. Gas chromatograph (GC 1120, Shanghai Sunny Hengping Limited, HTCD,  $\text{N}_2$  carrier gas) was used to measure the evolved  $\text{H}_2$ . The photocatalytic reaction time for each test was set as 4 h.

The apparent quantum yield (AQY) was calculated to assess the consistency between optical absorption and the AQY of CN/Ni@C-1 by using various wavelength monochromatic light illumination ( $\lambda = 420, 450, 500, 550, \text{ and } 600\text{ nm} \pm 5\text{ nm}$ ). The AQY was estimated based on the following equation:

$$\text{AQY} = \frac{2 \times \text{number of evolved } \text{H}_2 \text{ molecules}}{\text{number of incident photons}} \times 100\%$$

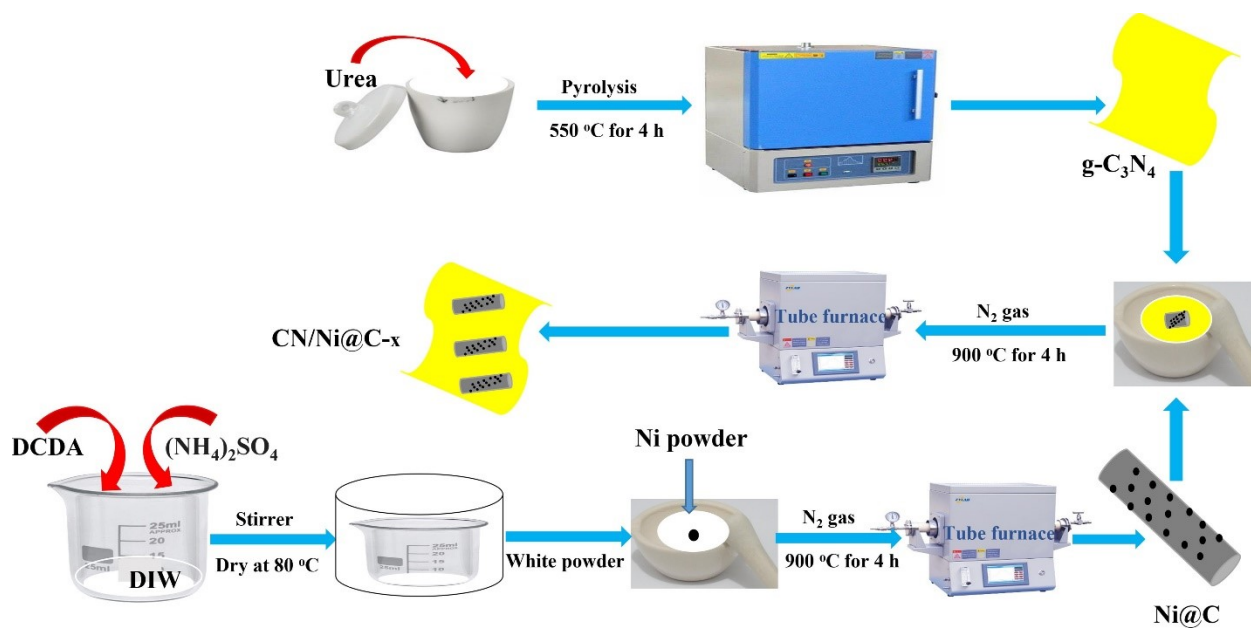

**Figure S1.** The schematic synthesis path of g-C<sub>3</sub>N<sub>4</sub>, Ni@C, and CN/Ni@C-x samples.

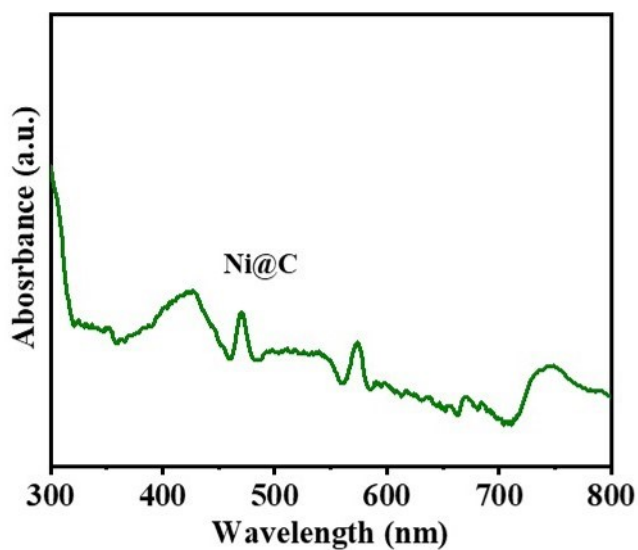

**Figure S2.** UV-vis diffuse reflectance spectra (UV-DRS) of Ni@C nanoparticles.

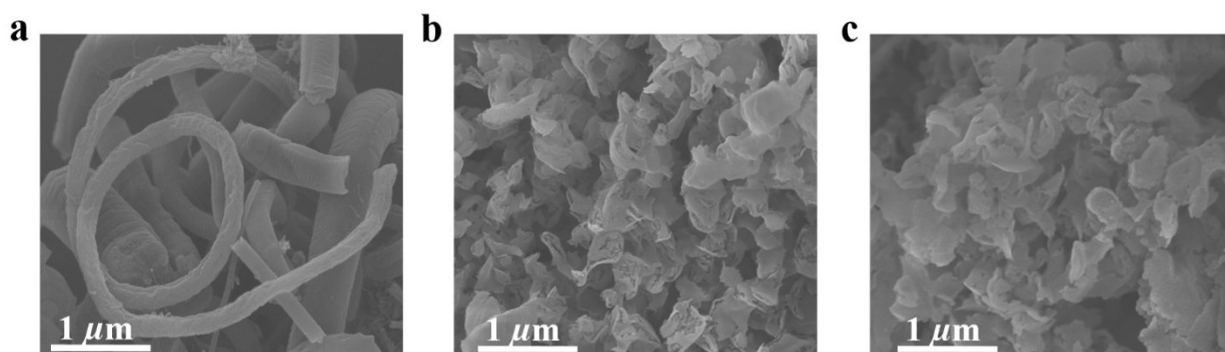

**Figure S3.** SEM Images of Ni@C NPs, g-C<sub>3</sub>N<sub>4</sub> nanosheets, and CN/Ni@C-1 photocatalysts.

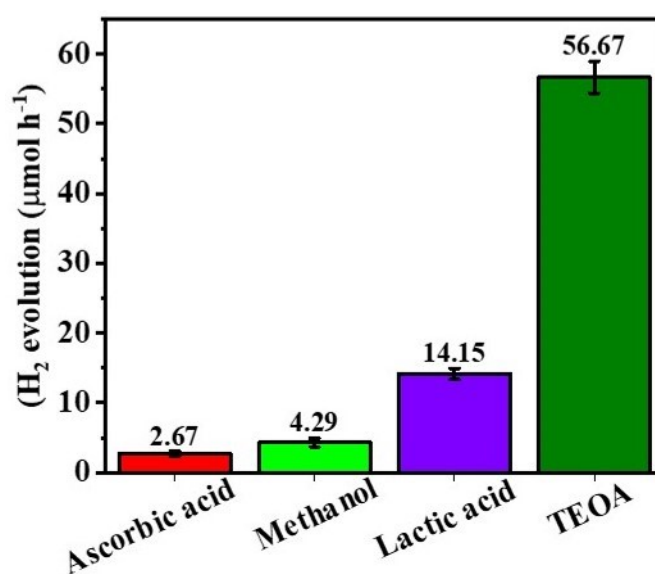

**Figure S4.** Visible-light irradiated H<sub>2</sub> evolution from water splitting over CN/Ni@C-1 nanocomposite photocatalyst in the presence of different sacrificial agents.

**Table S1.** Comparison of our study H<sub>2</sub> evolution rate results with the previous reported photocatalysts.

| S.# | Photocatalysts                                                    | Cocatalyst | Light source             | H <sub>2</sub> evolution<br>( $\mu\text{mol h}^{-1}$ ) | AQY (%) | References |
|-----|-------------------------------------------------------------------|------------|--------------------------|--------------------------------------------------------|---------|------------|
| 1   | Co/g-C <sub>3</sub> N <sub>4</sub>                                | 3% Pt      | 300 Xe- lamp<br>(420 nm) | 28.0                                                   | -       | 1          |
| 2   | g-C <sub>3</sub> N <sub>4</sub> /CoTPP                            | 1% Pt      | 300 Xe-lamp<br>(420 nm)  | 46.93                                                  | 4.2     | 2          |
| 3   | g-C <sub>3</sub> N <sub>4</sub> /NiFe <sub>2</sub> O <sub>4</sub> | 1% Pt      | 300 Xe- lamp<br>(420 nm) | 161.3                                                  | 2.46    | 3          |
| 4   | C/g-C <sub>3</sub> N <sub>4</sub>                                 | 1% Pt      | 300 Xe-lamp<br>(420 nm)  | 21.88                                                  | 0.90    | 4          |
| 5   | P-TCN                                                             | 1% Pt      | 300 Xe-lamp<br>(420 nm)  | 67.0                                                   | 5.68%   | 5          |
| 6   | CoP/g-C <sub>3</sub> N <sub>4</sub>                               | 2% Pt      | 300 Xe-lamp<br>(420 nm)  | 51.90                                                  | 1.1%    | 6          |
| 7   | MoS <sub>2</sub> /g-C <sub>3</sub> N <sub>4</sub>                 | 2% Pt      | 300 Xe-lamp<br>(420 nm)  | 43.38                                                  | -       | 7          |
| 8   | g-C <sub>3</sub> N <sub>4</sub> /Ni@C-1                           | 1% Pt      | 300 Xe-lamp<br>(420 nm)  | 56.67                                                  | 5.20    | This work  |

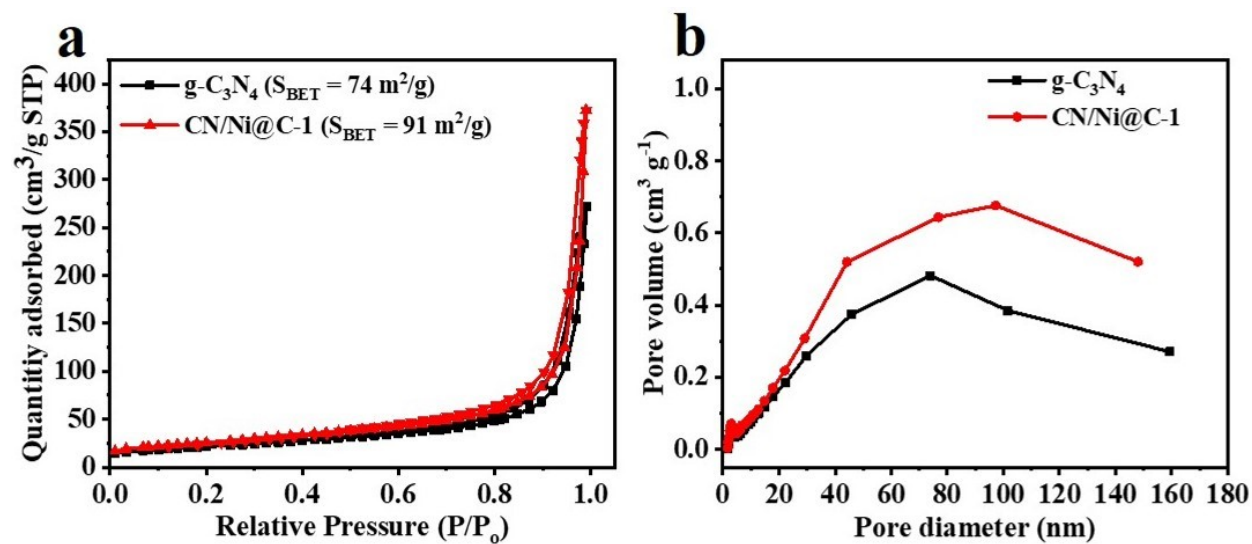

**Figure S5.** (a) Nitrogen adsorption-desorption isotherms. (b) Pore size distribution curves of  $g\text{-C}_3\text{N}_4$  and CN/Ni@C-1 samples.

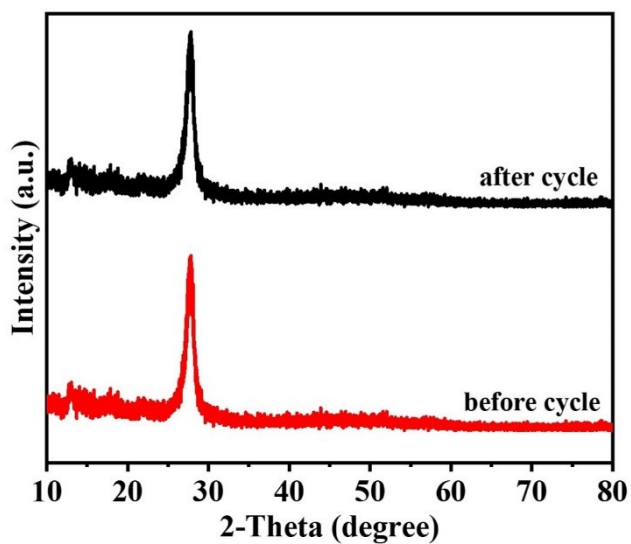

**Figure S6.** XRD patterns of CN/Ni@C-1 sample before and after recycle photocatalytic test.

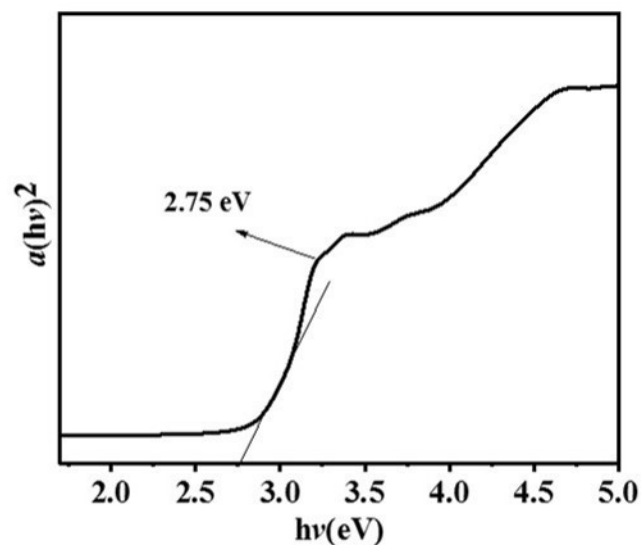

**Figure S7.** Plot of Kubelka-Munk calculated energy band gap of g-C<sub>3</sub>N<sub>4</sub>.

## REFERENCES

1. P.-W. Chen, K. Li, Y.-X. Yu and W.-D. Zhang, *Appl. Surf. Sci.*, 2017, **392**, 608-615.
2. M. Kombo, L.-B. Ma, Y.-N. Liu, X.-X. Fang, N. Ullah, A. H. Odda and A-W. Xu, *Catal. Sci. Technol.*, 2019, **9**, 2196-2202.
3. J. Chen, D. Zhao, Z. Diao, M. Wang and S. Shen, *Sci. Bull.*, 2016, **61**, 292-301.
4. Q. Xu, B. Cheng, J. Yu and G. Liu, *Carbon*, 2017, **118**, 241-249.
5. S. Guo, Z. Deng, M. Li, B. Jiang, C. Tian, Q. Pan and H. Fu, *Angew. Chem. Int. Ed*, 2016, **128**, 1862-1866.

6. Y. Liu, J. Zhang, X. Li, Z. Yao, L. Zhou, H. Sun and S. Wang, *Energ. Fuel.*, 2019, **33**, 11663-11676.
7. Y. Liu, X. Xu, J. Zhang, H. Zhang, W. Tian, X. Li, M. O. Tade, H. Sun and S. Wang, *Appl. Catal. B: Environ.*, 2018, **239**, 334-344.
